## Optogenetic control of the Bicoid morphogen reveals fast and slow modes of gap gene regulation

Anand P. Singh<sup>1\*</sup>, Ping Wu<sup>2\*</sup>, Sergey Ryabichko<sup>1</sup>, João Raimundo<sup>1</sup>, Michael Swan<sup>1,2</sup>, Eric Wieschaus<sup>1,2,\*\*</sup>, Thomas Gregor<sup>1,3,\*\*</sup>, Jared E. Toettcher<sup>2,\*\*</sup>

<sup>1</sup> Lewis Sigler Institute for Integrative Genomics  
Princeton University, Princeton NJ 08544

<sup>2</sup> Department of Molecular Biology  
Princeton University, Princeton NJ 08544

<sup>3</sup> Department of Physics  
Princeton University, Princeton NJ 08544

\* Contributed equally

\*\* Co-corresponding authors

Correspondence should be addressed to:

Jared E Toettcher  
[toettcher@princeton.edu](mailto:toettcher@princeton.edu)

Thomas Gregor  
[tg2@princeton.edu](mailto:tg2@princeton.edu)

Eric F Wieschaus  
[efw@princeton.edu](mailto:efw@princeton.edu)

## 1 **Abstract**

2 Developmental patterning networks are regulated by multiple inputs and feedback connections  
3 that rapidly reshape gene expression, limiting the information that can be gained solely from  
4 slow genetic perturbations. Here we show that fast optogenetic stimuli, real-time transcriptional  
5 reporters, and a simplified genetic background can be combined to reveal quantitative regulatory  
6 dynamics from a complex genetic network *in vivo*. We engineer light-controlled variants of the  
7 Bicoid transcription factor and study their effects on downstream gap genes in embryos. Our  
8 results recapitulate known relationships, including rapid Bicoid-dependent expression of *giant*  
9 and *hunchback* and delayed repression of *Krüppel*. In contrast, we find that the posterior pattern  
10 of *knirps* exhibits a quick but inverted response to Bicoid perturbation, suggesting a previously  
11 unreported role for Bicoid in suppressing *knirps* expression. Acute modulation of transcription  
12 factor concentration while simultaneously recording output gene activity represents a powerful  
13 approach for studying how gene circuit elements are coupled to cell identification and complex  
14 body pattern formation *in vivo*.

## 15 Main Text

16 Gene networks play a crucial role in developmental patterning, transforming rudimentary  
17 positional cues into a multitude of sharply defined domains of gene expression. Such networks  
18 are typically characterized by redundant inputs to ensure that gene expression is initialized  
19 appropriately, and feedback connections between genes in the network to ensure a consistent  
20 patterning response. Information from these inputs is integrated at enhancers that bind multiple  
21 transcription factors and control gene expression through transient interactions with promoters  
22 and longer-term alterations of chromatin structure and accessibility. Understanding how  
23 networks function requires knowing the time scales over which individual components operate.

24  
25 The gap gene network of the early *Drosophila* embryo is a canonical example of such a  
26 sophisticated pattern-forming system. In this network, the expression of four core transcription  
27 factors – the gap genes *giant* (*gt*), *hunchback* (*hb*), *Krüppel* (*Kr*), and *knirps* (*kni*) – is initiated by  
28 three partially-redundant sources of positional information that are maternally deposited in the  
29 egg. These maternally supplied inputs include an anterior-to-posterior gradient of the Bicoid  
30 (Bcd) transcription factor, a posterior-to-anterior gradient of the Nanos RNA binding protein,  
31 and Torso receptor tyrosine kinase signaling at the anterior and posterior poles. In addition to  
32 responding to maternal inputs, the four gap genes further regulate themselves and each other to  
33 generate bands of gene expression that are essential for specifying the body plan (**Figure 1a-b**)<sup>1</sup>.

34  
35 A useful first step in disentangling such networks has been to characterize transcriptional  
36 responses under conditions where input information has been reduced to single components or  
37 flattened so that all cells in the embryo see the same input values (**Figure 1c-d**). For example,

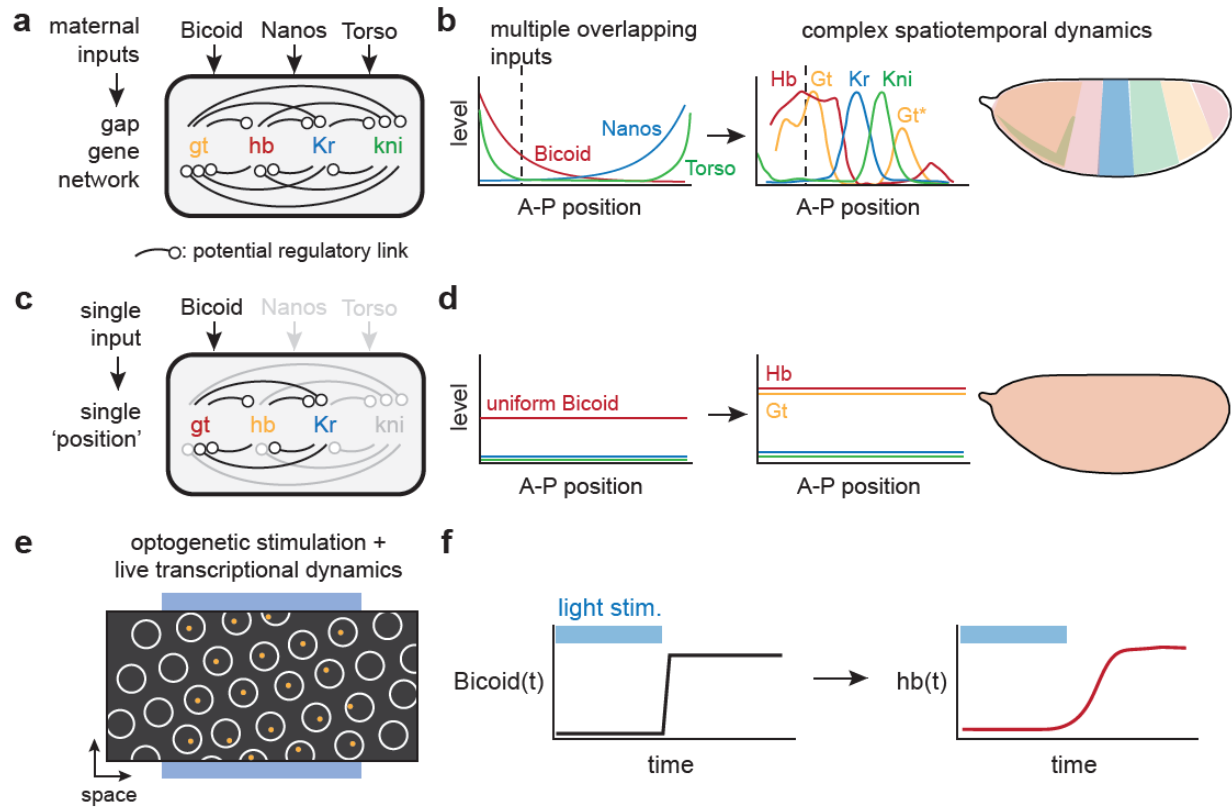

38

**Figure 1. Studying Bicoid-dependent gap gene responses using a stimulus-response approach in single-input embryos.** (a-b) The endogenous gap gene network depends on three maternally-supplied inputs (Bicoid, Nanos, and Torso) and many potential feedback and crosstalk links (in a) to generate bands of gap gene expression across the embryo (in b). A detailed understanding of this network is made challenging by the presence of multiple redundant inputs and complex dynamics as spatial patterns shift over time. (c-d) To study the effects of the Bicoid transcription factor on gap gene expression, we set out to construct a reduced-complexity network where Bicoid is the sole maternally supplied input to the network (in a) and spatial patterning is eliminated (in b), eliminating both redundancy and spatiotemporal dynamics. (e-f) To define the strength, duration, and dynamics of Bicoid-dependent gap gene responses, we acutely perturb nuclear Bicoid levels using an optogenetic technique and monitor resulting gene expression in individual nuclei using live transcription reporters.

39

40

when all anterior-posterior (A-P) patterning inputs except Bicoid are eliminated, the pattern is

41

reduced and shifted relative to wildtype, but the fundamental sequence of all four gap genes is

42

maintained<sup>2</sup>. Similarly, flattening spatial patterns generates embryos that reflect a single A-P

43

position along the wild-type gradient without the complexity of network components diffusing

44

across shifting gene expression boundaries<sup>3,4</sup>. While such simplified systems can provide useful

45

insights about Bicoid-dependent features of the network, they do not distinguish between direct

46

and indirect effects, or long- and short-term mechanisms.

47 Real-time measurement of responses to acute perturbations provides a useful approach to  
48 characterize a network's dynamic features<sup>5,6</sup>. Differences in response kinetics can also  
49 distinguish direct interactions (e.g., where a transcription factor directly regulates its target's  
50 expression) from indirect links (where an intermediate gene product must first be synthesized).  
51 Although such rapid stimulus-response experiments have been traditionally difficult to perform  
52 *in vivo*, the recent advent of optogenetic perturbations and live biosensors of gene expression  
53 offer the possibility to dissect gene expression networks with unprecedented resolution (**Figure**  
54 **1e-f**)<sup>6-10</sup>.

55  
56 Here, we describe a strategy for dissecting Bcd-dependent gap gene responses using fast  
57 stimulus-response measurements in simplified embryos that lack redundant inputs and spatial  
58 patterns. We generated a series of light-sensitive Bcd variants whose nuclear-cytosolic  
59 localization can be shifted in less than a minute using blue light. We introduced these variants in  
60 embryos that lack all other sources of A-P asymmetry, eliminating the protein gradients and  
61 shifting spatial distributions that typically complicate the study of patterning gene networks.  
62 When constructed using optogenetic Bcd variants with different activity levels, these synthetic  
63 spatially-homogeneous embryos mimic either anterior, central, or posterior embryonic positions,  
64 offering a toolbox for studying the real-time transcriptional responses to acute perturbation of a  
65 developmental patterning cue. Combining acute optogenetic Bcd perturbation with live-embryo  
66 biosensors of gap gene expression reveals both rapid and delayed modes of Bcd-dependent  
67 regulation. Anteriorly expressed gap genes *gt* and *hb* respond within minutes to changes in Bcd  
68 concentration, consistent with a direct role for Bcd in their transcriptional activation. In contrast,  
69 the medial gap gene *Kr* exhibits a delayed and inverted response, indicative of indirect Bcd-

70 induced repression through an intermediate node. Finally, we report that the posteriorly  
71 expressed gap gene *kni* is rapidly transcribed upon acute loss of nuclear Bcd, an unexpected  
72 response suggesting that Bcd acts to repress *kni* expression without requiring new gene synthesis.  
73 Our approach, combining rapid nuclear-cytosolic shuttling of a transcription factor with real-time  
74 transcription measurements in a developmental gene regulatory network, offers the possibility to  
75 dissect regulatory links with unprecedented precision.

76

## 77 **Results**

### 78 **An activity series of optogenetic Bicoid variants with rapid stimulus-response kinetics**

79 We engineered optogenetic variants of Bcd to serve as rapidly-switchable inputs to the gap  
80 gene network. We fused Bcd to LEXY, an optogenetic tool based on the AsLOV2 protein  
81 domain whose nuclear export is reversibly triggered by blue light, enabling rapid and titratable  
82 optogenetic control over transcription factor activity<sup>11-15</sup>. Blue light illumination uncages a  
83 buried nuclear export sequence (NES) in LEXY's C-terminal J $\alpha$  helix; in the dark, NES activity  
84 is lost and Bcd's nuclear localization signal (NLS) returns the fusion protein into the nucleus  
85 (**Figure 2a**). LEXY-based translocation typically produces a 5-fold change in nuclear protein  
86 concentration<sup>11,13</sup> whereas the natural Bcd gradient is thought to affect gene expression over a  
87 larger range, suggesting that Bcd variants at various expression or activity levels may be required  
88 to probe gap gene responses at different embryonic positions. We thus tested a series of Bcd-  
89 LEXY variants that were either left untagged or N-terminally fused to different fluorescent  
90 proteins, a modification previously observed to generate distinct Bcd activity levels (see  
91 **Methods**)<sup>16</sup>.

92

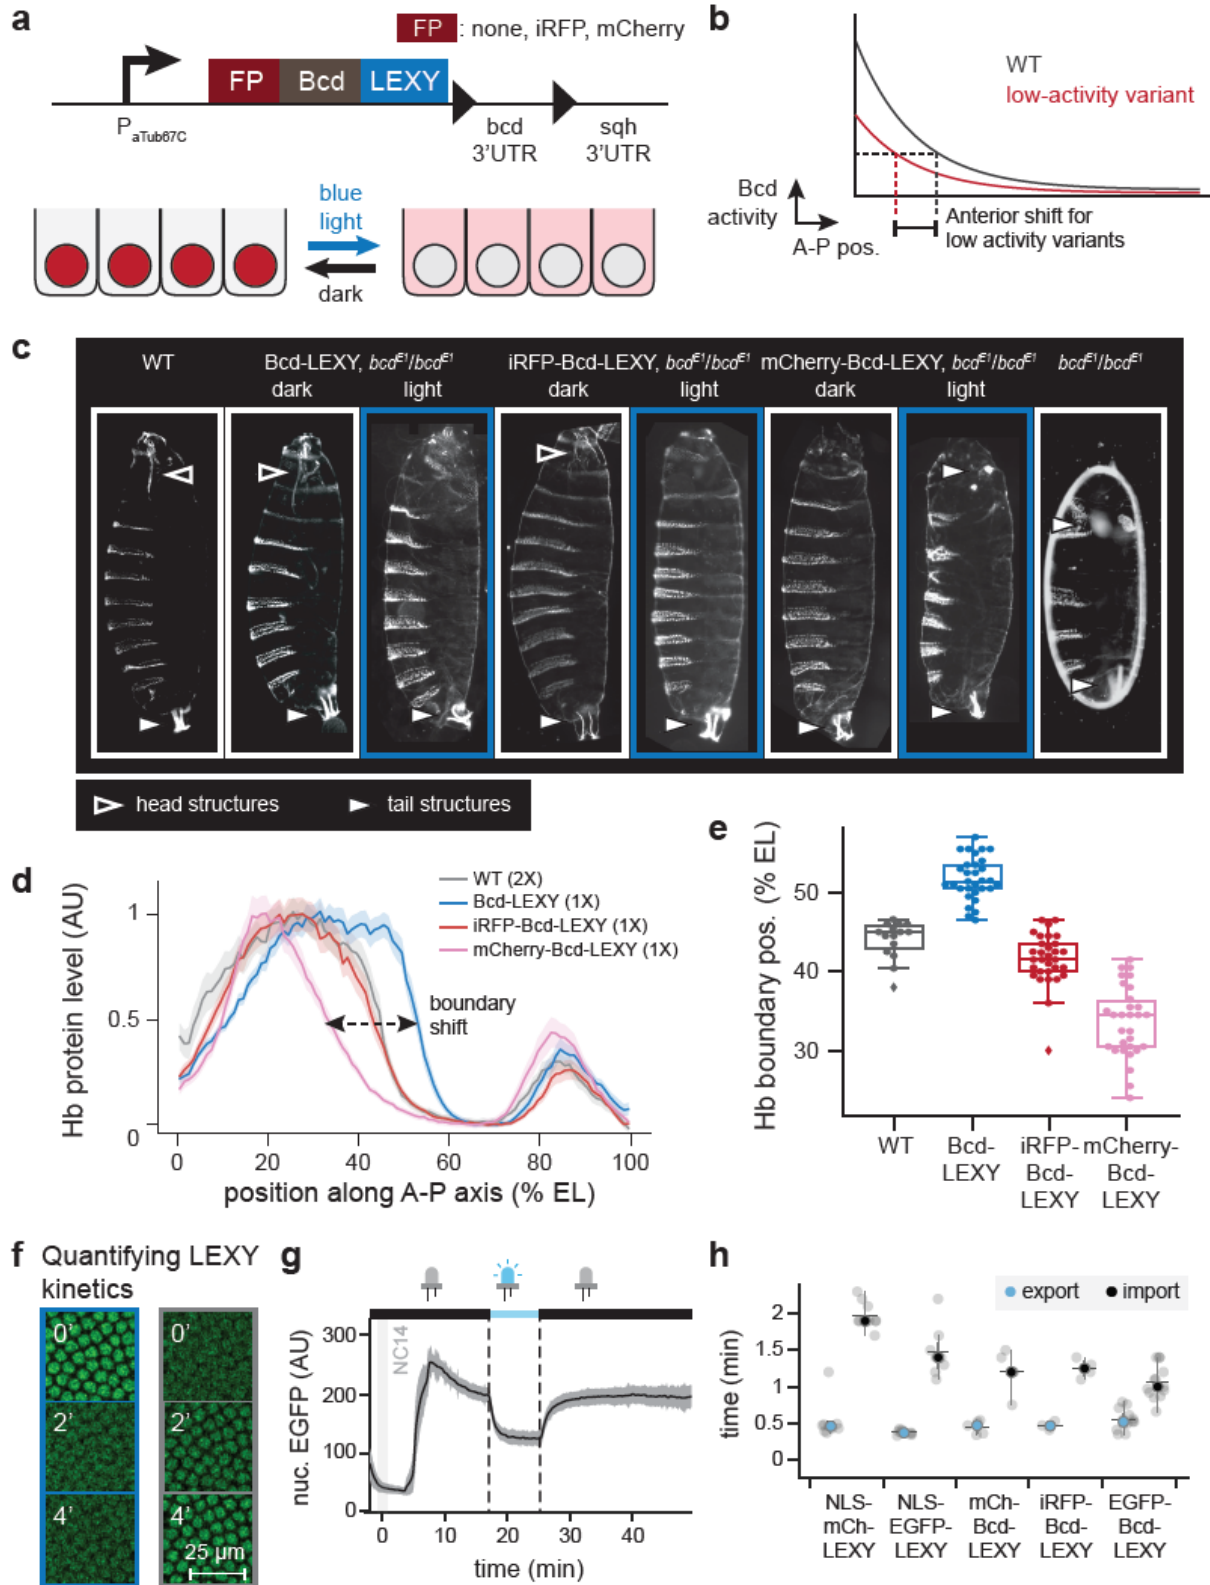

**Figure 2. A series of optogenetic Bicoid variants with variable activity and rapid kinetics.** (a) Bicoid was fused to various fluorescent proteins at its N terminus and to the LEXY optogenetic system at its C terminus. 450 nm light illumination exposes LEXY's nuclear export sequence (NES), leading to an expected decrease in Bicoid transcriptional activity. (b) Bicoid variants harboring weaker activity are expected to exhibit loss of anterior structures and an anterior shift of gene expression patterns. (c) Larval cuticles for Bcd-LEXY variants in dark and light conditions. Anterior head and posterior tail structures are indicated with the outlined and shaded arrows. Illuminated embryos exhibit loss of anterior structures or duplication of posterior structures, indicating progressive loss of Bicoid activity. (d-e) Immunofluorescence for Hunchback (Hb) protein for three Bcd-LEXY variants, compared to WT embryos. Hb levels are quantified as a function of position and genetic background in d, with the boundary of anterior Hb expression quantified for individual embryos in e. Bcd-LEXY exhibits high activity, whereas iRFP-Bcd-LEXY and mCherry-Bcd-LEXY exhibit progressively weaker activity as determined by the boundary of anterior Hb expression. (f-g) EGFP-Bcd-LEXY time course during cycle of optogenetic activation and deactivation. Representative images are shown in f; quantification during a nuclear cycle 14 (NC14) time course of light and dark exposure shown in g. (h) Quantification of import and export kinetics for five LEXY constructs is shown in h; similar kinetics of translocation are observed for fluorescent Bicoid variants and non-Bicoid-containing LEXY constructs.

94

95 To assess the function of each Bcd-LEXY variant, we generated embryos harboring a single  
96 variant as the sole Bcd source and assessed its function in the light and dark. Bcd is normally  
97 expressed in an anterior-to-posterior gradient, so conditions in which Bicoid activity is reduced  
98 should lead to loss of anterior structures and/or an anterior shift of gap gene expression patterns  
99 (Figure 2b). Bcd-LEXY and iRFP-Bcd-LEXY embryos exhibited body segmentation and  
100 cephalic furrow position consistent with high Bcd activity in the dark, and embryos harboring a  
101 single copy of either allele hatched at rates of 70% and 42%, respectively (Figure 2c; Table S1).  
102 Blue light led to an apparent reduction in Bcd activity, characterized by the loss of mouth parts  
103 and thoracic segments at the anterior and a loss of embryo viability. mCherry-Bcd-LEXY  
104 carrying embryos displayed weaker overall Bcd activity, as these embryos failed to form anterior  
105 structures in the dark and phenocopied *bcd<sup>E1</sup>* loss-of-function embryos under illumination  
106 (Figure 2c, right panels).

107



108 We also measured expression of the canonical Bcd target gene Hunchback (Hb) in embryos  
109 harboring each of the three Bcd-LEXY variants (**Figure 2d-e**). Compared to wild-type embryos,  
110 the position of the Hb boundary is shifted towards the posterior in Bcd-LEXY embryos and  
111 progressively shifts toward the anterior in iRFP-Bcd-LEXY and mCherry-Bcd-LEXY embryos,  
112 confirming that these three variants form an activity series: Bcd-LEXY > iRFP-Bcd-LEXY >  
113 mCherry-Bcd-LEXY. Immunostaining for Bcd revealed that the activity differences between our  
114 Bcd-LEXY variants are partially explained by differences in expression level between all three  
115 variants (**Figure S1a**). Nevertheless, all three variants were expressed at higher levels than wild-  
116 type Bcd, suggesting that fusion to LEXY and/or a fluorescent protein also partially interferes  
117 with Bcd function<sup>16,17</sup>.

118  
119 We quantitatively characterized nuclear import and export dynamics for each Bcd-LEXY  
120 variant as well as two LEXY-tagged fluorescent proteins that lacked any transcription factor  
121 fusions (NLS-mCherry-LEXY and NLS-EGFP-LEXY) (**Figure 2f-h**; see **Methods** for imaging  
122 details). Switching 450 nm light on or off led to a rapid redistribution of each Bcd-LEXY variant  
123 in nuclear cycle 14 (NC14) embryos (e.g., EGFP-Bcd-LEXY in **Figure 2g**). Comparable  
124 dynamic responses were observed across all variants, with light-induced nuclear export in 30 sec  
125 and darkness-induced import in 1-2 min (**Figure 2h**). Illumination also produced nuclear export  
126 of similar magnitude and spatial precision, with a 4-fold change in nuclear concentration  
127 between dark and light conditions and a spatial precision of ~10-12  $\mu\text{m}$  (1-2 cells) (**Figure S1b-**  
128 **d**). These data establish the LEXY system as a tool for rapid modulation of nuclear transcription  
129 factor concentration during pre-gastrulation *Drosophila* embryogenesis.

130

131 **A reduced-complexity embryo for dissecting Bcd regulation of gap gene expression**

132 Our goal is to use the fly embryo as a laboratory to measure stimulus-response functions for  
133 Bicoid's regulation of gap gene expression. We thus sought to simplify the experimental system,  
134 eliminating redundant inputs to the gap gene network as well as the complex spatial patterns  
135 found in wild-type embryos. Recent studies<sup>2,3,18</sup> established genetic strategies for producing  
136 embryos that lack all known sources of anterior-to-posterior variation, and we used these triple-  
137 mutant *bcd<sup>E1</sup> nos<sup>BN</sup> tsl<sup>4</sup> / bcd<sup>E1</sup> nos<sup>17</sup> tsl<sup>4</sup>* (henceforth referred to as *bnt*) embryos as a starting  
138 point for introducing light-controlled Bcd-LEXY variants (see **Methods** for detailed information  
139 on fly stock and genetics). We also reintroduced uniform levels of a weak Nanos variant (*nos*  
140 TCEIUC:AG)<sup>19,20</sup> to suppress maternal Hb protein expression; the resulting embryos, termed  
141 *nos-tub bnt*, are devoid of all three A-P patterning cues and produce a posterior-like gene  
142 expression state throughout the embryo (**Figure S2a**). Onto this background we expressed a  
143 single Bcd-LEXY variant at a uniform level across the embryo to serve as the sole patterning  
144 input to the gap gene network<sup>3</sup>. Bcd-LEXY *nos-tub bnt* embryos can thus be thought of as  
145 representing a single embryonic “position” set by Bcd which can subsequently be perturbed  
146 using light (see e.g. **Figure 3a** for *Kr* in uniform mCherry-Bcd-LEXY embryos).

147  
148 To define the A-P position represented by each uniformly expressed Bicoid-LEXY variant,  
149 we measured the transcriptional activity for four gap genes (*gt*, *hb*, *Kr* and *kni*) using the  
150 MS2/MCP system (see **Methods**; **Figure 3b-e**; **Figure S2b-c**; **Video S1-S4**). We found that our  
151 baseline *nos-tub bnt* embryos lacking all A-P patterning transcribed high levels of *kni* and *gt*, but  
152 low levels of *Kr* and no detectable *hb* (**Figure 3b** and arrow in **3f**). This pattern was altered  
153 dramatically in the presence of uniformly expressed Bcd-LEXY, which drove an anterior-like

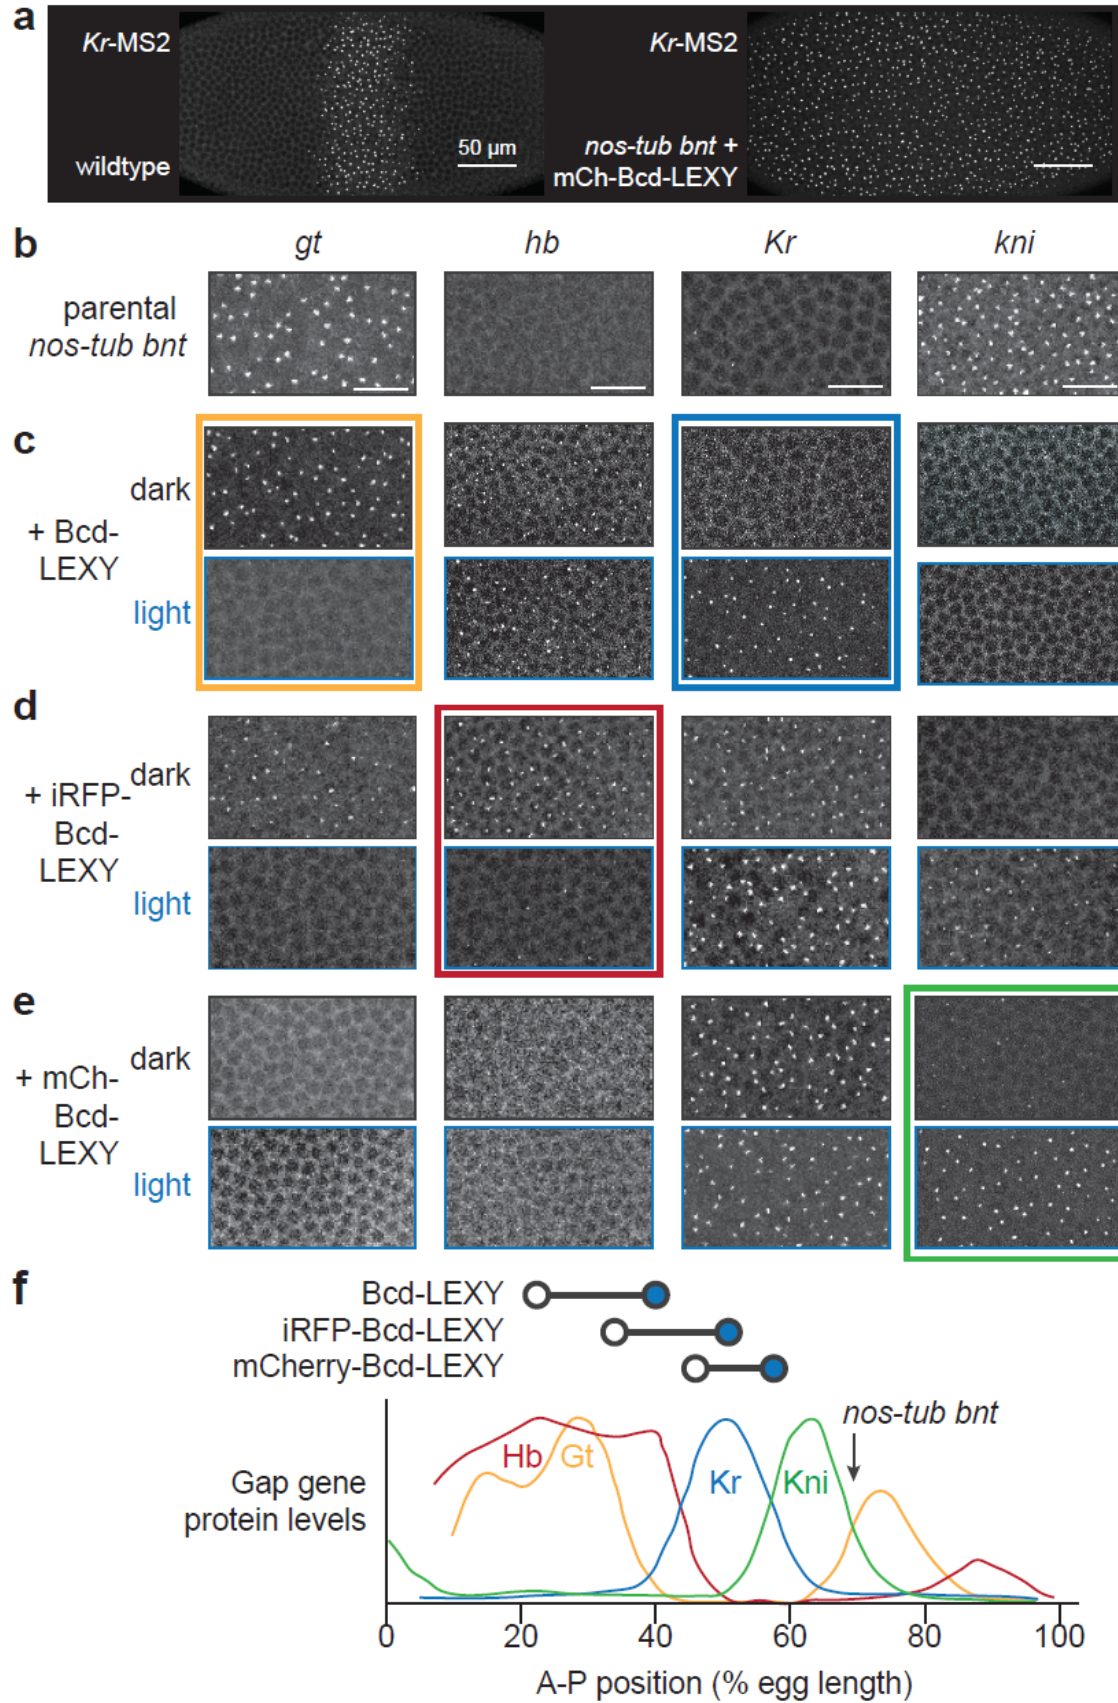

**Figure 3. Spatially-uniform, single-input embryos to enable optogenetic interrogation of specific gap genes.** (a) Nuclear cycle 14 embryos imaged using a *Kr* MS2 reporter. Left: embryo exhibiting wild-type A-P patterning. Right: *nos-tub bnt* embryo harboring a single copy of uniformly-expressed mCherry-Bcd-LEXY. The *nos-tub bnt* background eliminates all maternally supplied A-P patterns, so a uniformly expressed Bcd-LEXY variant produces a single approximate A-P position per embryo. (b-e) Regions of embryos showing MS2 reporter transcription for all four gap genes in (b) *nos-tub bnt*, (c) *nos-tub bnt* + Bcd-LEXY, (d) *nos-tub bnt* + iRFP-Bcd-LEXY, and (e) *nos-tub bnt* + mCherry-Bcd-LEXY embryos. For optogenetic illumination experiments, embryos were bathed in 450 nm light for 1 h. (f) Mapping approximate embryonic positions represented by dark and light conditions in each genetic background. Bottom: diagram from Ref. 2 quantifying gap gene expression as a function of A-P position, with posterior = 100% EL. Top: the approximate position based on gap gene expression for each optogenetic variant under in illuminated (open circle) and dark conditions (blue circle).

155

156

of *gt* and *hb* transcription in the dark, shifting to a mid-embryo-like state of *hb* and *Kr*

157

transcription in the light (**Figure 3c**). Uniform iRFP-Bcd-LEXY embryos transcribed *gt*, *hb*, and

158

*Kr* in the dark, shifting to *Kr* and *kni* expression in the light (**Figure 3d**). Finally, mCherry-Bcd-

159

LEXY embryos shifted between weak and strong *kni* transcription depending on illumination

160

conditions, with high *Kr* transcription in both cases (**Figure 3e**).

161

162

Comparing the combinations of gap genes expressed in each background to a wild-type

163

embryo suggests a mapping between each Bcd-LEXY variant and embryonic position (**Figure**

164

**3f**). Illumination shifts Bcd-LEXY embryos from high *hb* and *gt* expression to *hb* alone, which

165

normally occurs between ~20-40% egg length (EL); similarly, iRFP-Bcd-LEXY embryos shift

166

from ~35-50% EL, and mCherry-Bcd-LEXY embryos from ~45-60% EL (**Figure 3f**, top).

167

Notably, parental *nos-tub bnt* embryos express high levels of *kni* and *gt*, consistent with a

168

position of ~70% EL, because their reduced expression levels of maternal Hb allows that

169

expression but does not promote expression of more posterior targets in the absence of Torso/Erk

170

signaling (**Figure 3f**, arrow). Importantly, these results define the optogenetic Bcd variants that

171

can be used to switch each of the four core gap genes between high and low expression levels: *gt*

172

(Bcd-LEXY), *hb* (iRFP-Bcd-LEXY), *Kr* (Bcd-LEXY) and *kni* (mCherry-Bcd-LEXY) (**Figure**

173 **3b-e**; colored boxes), which we used to interrogate the transcriptional dynamics of each gap gene  
174 in the following live-imaging experiments.

175

### 176 **Anterior patterns of *hb* and *gt* respond rapidly to changes in nuclear Bcd concentrations**

177 How do gap genes respond to acute changes in nuclear Bcd concentration? To answer this  
178 question, we set out to combine optogenetic Bcd-LEXY control with live imaging of individual  
179 gap genes using the MS2/MCP system. We constructed a confocal microscope that combines a  
180 tunable 2-photon (2P) laser for GFP/mCherry imaging with a digital micromirror device and 450  
181 nm LED for optogenetic stimulation (see **Methods; Figure 4a; Figure S3a**). 2P excitation is  
182 ideal because it can be used for simultaneous GFP and mCherry imaging without triggering  
183 AsLOV2 excitation (**Figure S3b; Video S5-6**), enabling high-resolution volumetric imaging  
184 without undesirable photoactivation of our optogenetic system<sup>21,22</sup>.

185

186 We engineered embryos that maternally express a desired uniform Bicoid-LEXY variant as  
187 well as two additional constructs: an MCP-mNeonGreen protein for live transcript  
188 visualization<sup>23-25</sup> and an NLS-mCherry-LEXY indicator to define the current activity state of our  
189 optogenetic system (**Figure S3c-d**; see **Methods**). By crossing females of this genotype with  
190 males harboring a desired MS2-tagged gap gene reporter, we can thus deliver optogenetic stimuli  
191 while imaging both LEXY nuclear translocation and transcriptional responses in individual  
192 nuclei over time in live embryos (see **Figure 4b** using the *gt*-MS2 reporter).

193

194 We first performed stimulus-response measurements for Bcd regulation of anterior *hb*  
195 expression using our medium-activity iRFP-Bcd-LEXY variant (**Figure 4c-d**). We measured *hb*

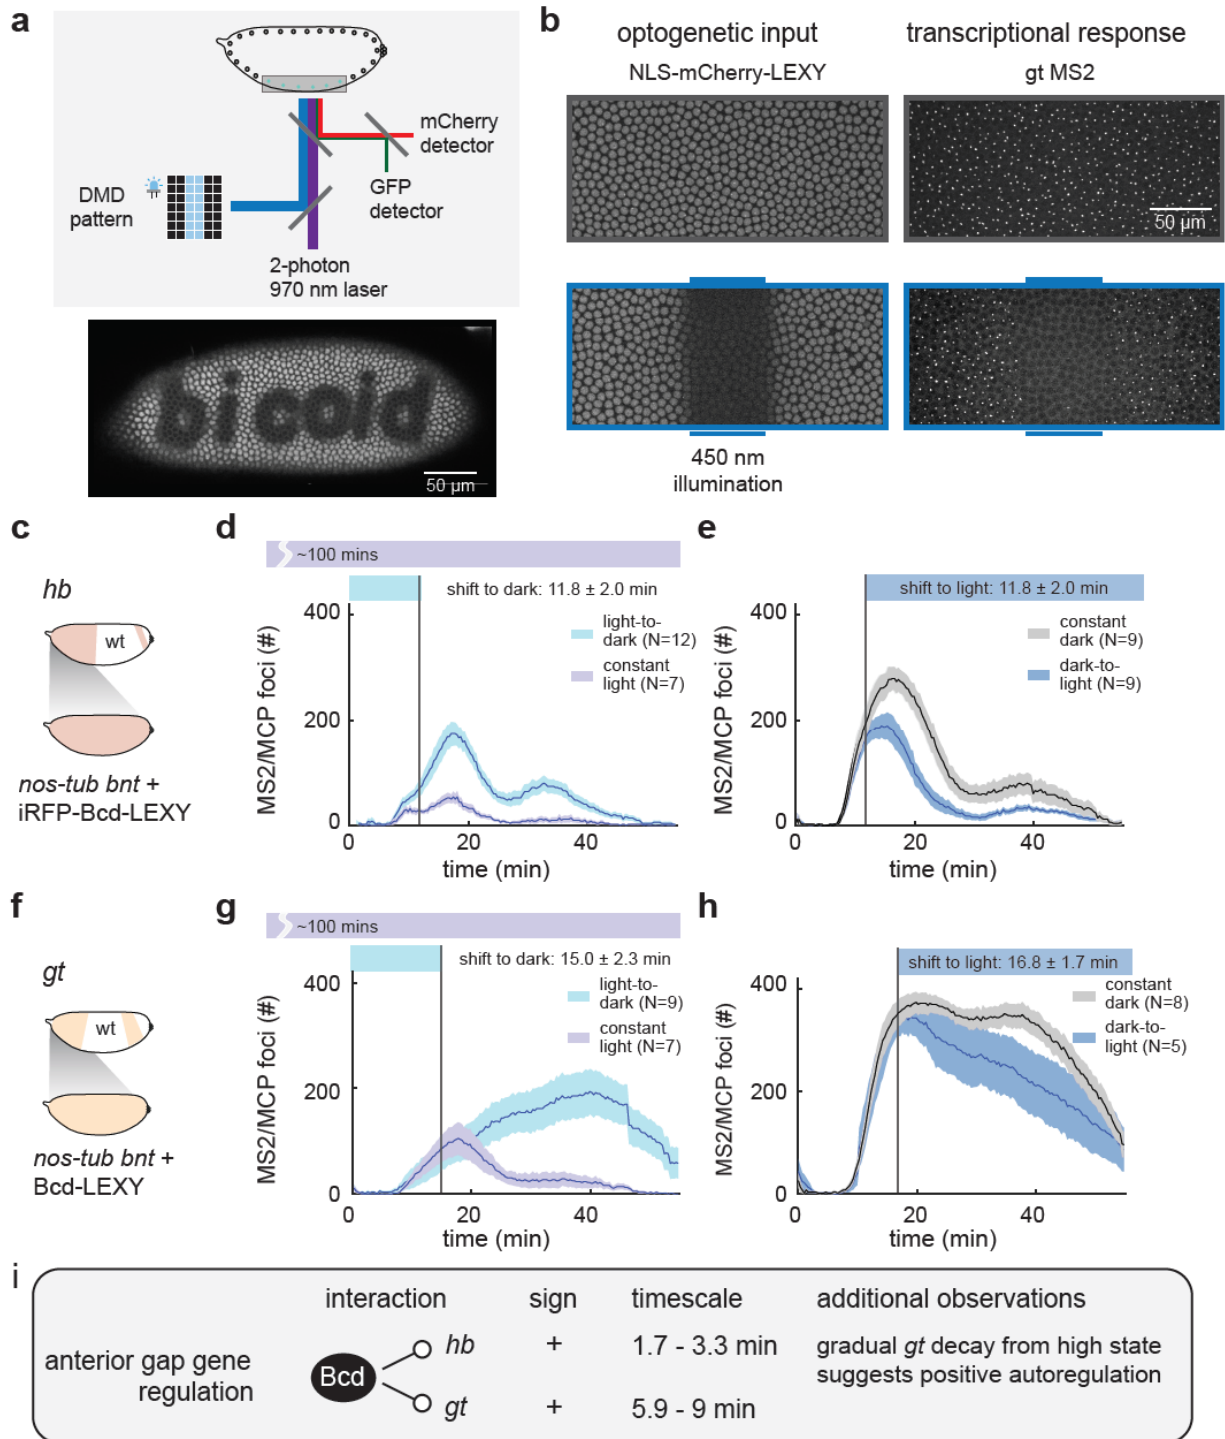

196

**Figure 4. Optogenetic stimulation and live transcription measurement for anterior expression patterns of *gt* and *hb*.** (a) Schematic of optogenetic activation and two-photon imaging setup. 450 nm LED light is patterned using a digital micromirror device (DMD) to deliver optogenetic stimuli. Two-photon imaging at 970 nm excites GFP and mCherry without crosstalk to the LEXY optogenetic system. (b) Example of light stimulation and two-color imaging of NLS-mCherry-LEXY and MCP foci for a *gt* MS2 transcriptional reporter. Images show ventral regions of representative embryos in the absence or presence of a 450 nm light input delivered in a stripe in the middle of the embryo. (c-e) Optogenetic interrogation of Bcd-induced anterior *hb* expression dynamics. Uniformly expressed iRFP-Bcd-LEXY embryos were imaged for *hb* MS2 reporter expression (schematic in c) upon an acute shift from light to dark (in d) and dark to light (in e); constant-light and constant-dark stimuli were used as controls. (f-h) Optogenetic interrogation of Bcd-induced anterior *gt* expression dynamics. Uniformly expressed Bcd-LEXY embryos were imaged for *gt* MS2 reporter expression (schematic in f) upon an acute shift from light to dark (in g) and dark to light (in h); constant-light and constant-dark stimuli were used as controls. (i) Summary of stimulus-response results for *gt* and *hb*. Rapid light-triggered changes in both *gt* and *hb* transcription are consistent with direct activation by Bcd. Subsequent gradual changes in *gt* expression suggest the presence of positive autoregulation. For d, e, g, and h, shaded regions show standard error of the mean, and the number of embryos tested is indicated on each plot.

197

198 transcription in response to an acute increase in Bcd activity by shifting from blue light to dark  
199 conditions during early NC14; continuously illuminated embryos were used as a control (**Figure**  
200 **4d; Figure S4a**). We found that *hb* expression rose rapidly after a light-to-dark shift; quantifying  
201 this response time revealed a shift within  $1.7 \pm 0.9$  min after light perturbation (mean  $\pm$  SEM; see  
202 **Table S2**). Conversely, acute removal of Bcd by switching from dark to light conditions caused  
203 *hb* expression to fall relative to dark-incubated controls within  $3.3 \pm 1.1$  min (**Figure 4e**). These  
204 data indicate that gap gene transcription can respond extremely rapidly to acute increases or  
205 decreases in nuclear Bcd concentration and are consistent with the standard model of Bcd acting  
206 as a direct transcriptional activator of anterior *hb* expression.

207

208 How do the anterior expression dynamics of *gt* compare to those of *hb*? We examined a *gt*  
209 MS2 reporter<sup>26</sup> under similar light-to-dark and dark-to-light illumination shifts in NC14 (**Figure**  
210 **4f-h; Figure S4b**). As in the case of *hb*, we found that optogenetic Bcd perturbations were  
211 rapidly transmitted to *gt* expression, with response times of  $5.9 \pm 1.6$  min and  $9 \pm 2.7$  min

212 depending on the illumination sequence, indicative of direct transcriptional activation (**Figure**  
213 **4g-h; Table S2**). However, unlike the case for *hb*, *gt* transcription continued changing gradually,  
214 only approaching a final expression state over ~30 min. A rapid initial response followed by  
215 delayed progression towards a final state is suggestive of positive autoregulation<sup>27</sup>, for example  
216 if *gt* transcription were positively influenced by the past history of gap gene (*gt* or *hb*)  
217 expression. Indeed, positive feedback on *gt* transcription by Gt protein was recently reported<sup>26</sup>.  
218 In summary, live-embryo stimulus-response measurements identify *hb* and *gt* as direct Bcd  
219 transcriptional targets and suggest *gt* as a potential target of positive autoregulation (**Figure 4i**).

220

### 221 **Optogenetic Bcd stimuli produce delayed and inverted *Kr* transcriptional responses**

222 To explore how dynamic changes in Bcd concentration alter the expression of gap genes in  
223 the middle of the embryo, we next turned to the gap gene *Kr* (**Figure 5a**). *Kr* expression is  
224 known to be regulated by multiple transcription factors, including Bcd<sup>28-30</sup>, Stat92E<sup>31</sup>, Zelda  
225 (Zld)<sup>32</sup>, and Hunchback (Hb)<sup>30,33</sup>; this complex regulation is thought to ensure that *Kr* is  
226 expressed in a narrow central band, with low expression at both anterior and posterior embryonic  
227 positions.

228

229 We performed stimulus-response measurements in Bcd-LEXY embryos, which exhibit stark  
230 differences in *Kr* expression between constant blue light and dark conditions that reflect  
231 optogenetic switching across the anterior boundary of the *Kr* pattern (**Figure S4c**). An acute  
232 increase in nuclear Bcd-LEXY drove a corresponding decrease in *Kr* transcription, consistent  
233 with our expectation of low *Kr* expression at anterior positions (**Figure 5b**). However, unlike *hb*  
234 and *gt*, the change in *Kr* transcription only began after a  $22 \pm 2$  min delay (**Table S2**).



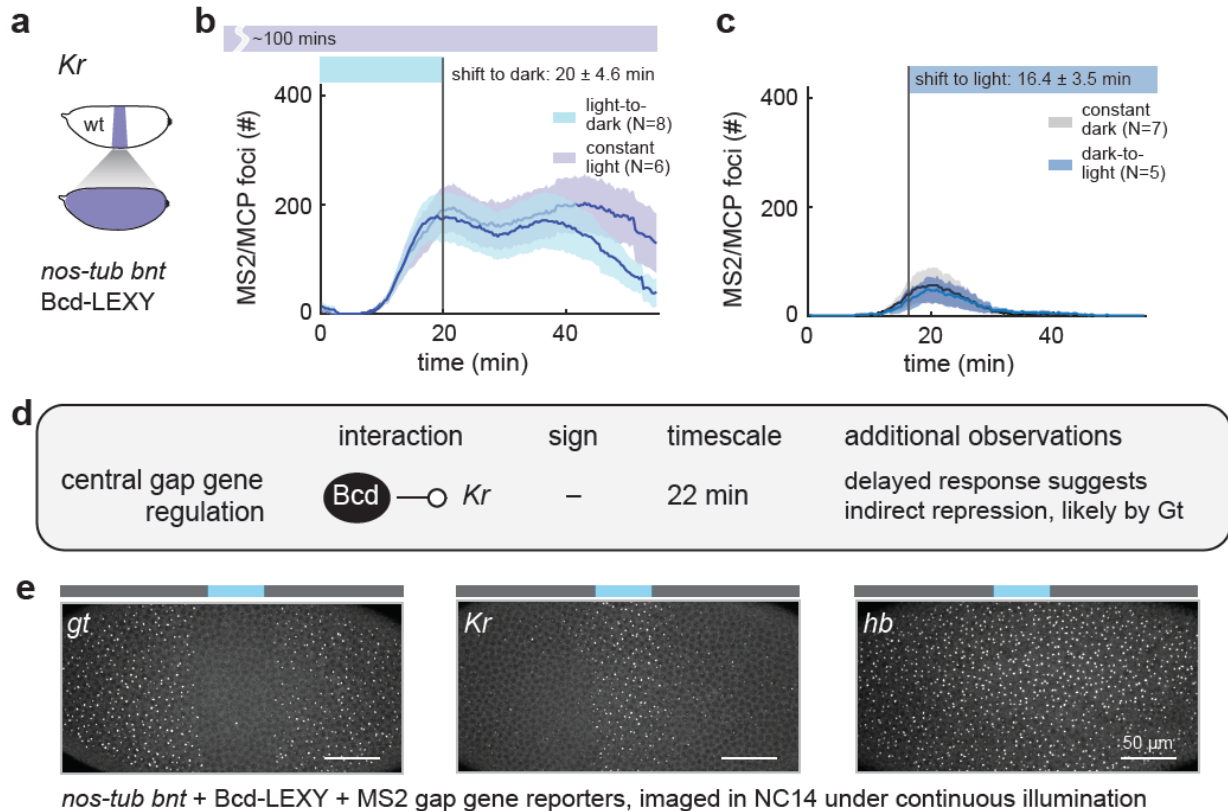

235

**Figure 5. Acute perturbation of Bcd reveals delayed negative regulation of *Kr* transcription.** (a-c) Optogenetic interrogation of Bcd-induced *Kr* transcription dynamics. Uniformly expressed Bcd-LEXY embryos were imaged using a *Kr* MS2 reporter (schematic in a) upon an acute shift from light to dark (in b) and dark to light (in c); constant-light and constant-dark stimuli were used as controls. (d) Summary of rapid perturbation results. An acute increase in nuclear Bcd-LEXY concentration drives loss of *Kr* expression after a 22 min delay. Conversely, *Kr* transcription is not observed for at least 1 h after an acute decrease in nuclear Bcd levels. (e) Measurement of *gt*, *Kr*, and *hb* transcription after continuous, local illumination in Bcd-LEXY embryos. Transcription of *gt* is suppressed where *Kr* is transcribed, whereas *hb* is largely unaffected in the Bcd-LEXY background. For b-c shaded regions show standard error of the mean, and the number of embryos tested is indicated on each plot.

236

237 Conversely, shifting the embryo from a high-Bcd state to a low-Bcd state in early NC14 did not

238 lead to any detectable change in *Kr* expression prior to gastrulation, indicating that an even

239 longer time period may be required to establish *Kr* expression upon loss of Bcd (Figure 5c).

240

241

242 These results support a model where high nuclear Bcd levels induce expression of a stable

243 repressor of *Kr* expression (Figure 5d). An acute rise in Bcd would only produce the repressor

244 after the time needed for new protein synthesis, and repressor degradation would be required for  
245 *Kr* expression to respond to a drop in Bcd activity. Our data also points to a likely candidate  
246 repressor among the gap genes. We observe a tight correlation between the spatial expression  
247 domains of *Kr* and *gt* in illuminated Bcd-LEXY embryos, suggesting that Gt may act as the long-  
248 lived, Bcd-induced negative regulator (**Figure 5e**). This model is well supported by prior  
249 studies<sup>34-37</sup> identifying Gt as a potent repressor of *Kr* expression. In sum, our stimulus-response  
250 framework can be used to measure transcription dynamics that can in turn provide insight into  
251 direct and indirect links within a gene regulatory network.

252

### 253 ***kni* is transcribed rapidly upon light-triggered loss of nuclear Bcd**

254 Our final target for optogenetic stimulus-response analysis was the posterior pattern of *kni*  
255 expression (**Figure 6a**). The gap gene *kni*, which is required for specification of posterior body  
256 segments, is thought to be induced by Bcd and Caudal (Cad) and repressed by Hb<sup>38,39</sup>. This  
257 complex and redundant regulation involves both maternally supplied anterior inputs (e.g., Bcd-  
258 dependent Cad patterning) and posterior cues (e.g., Nanos-dependent patterning of maternal Hb).  
259 Interestingly, we observe high *kni* expression even in *nos-tub bnt* embryos (**Figure 3b**), raising  
260 the question of how Bcd affects expression of a gap gene that is still highly expressed in the  
261 absence of Bcd.

262

263 We examined the Bcd-dependent dynamics of *kni* expression<sup>25</sup> in embryos expressing the  
264 lowest activity mCherry-Bcd-LEXY variant (**Figure 6b-c; Figure S4d**). Acutely dropping  
265 nuclear Bcd concentration led to a dramatic and unexpected change in *kni* transcription (**Figure**  
266 **6c**). Within  $2.9 \pm 0.9$  mins after a loss of nuclear Bcd, *kni* transcription began rising rapidly to

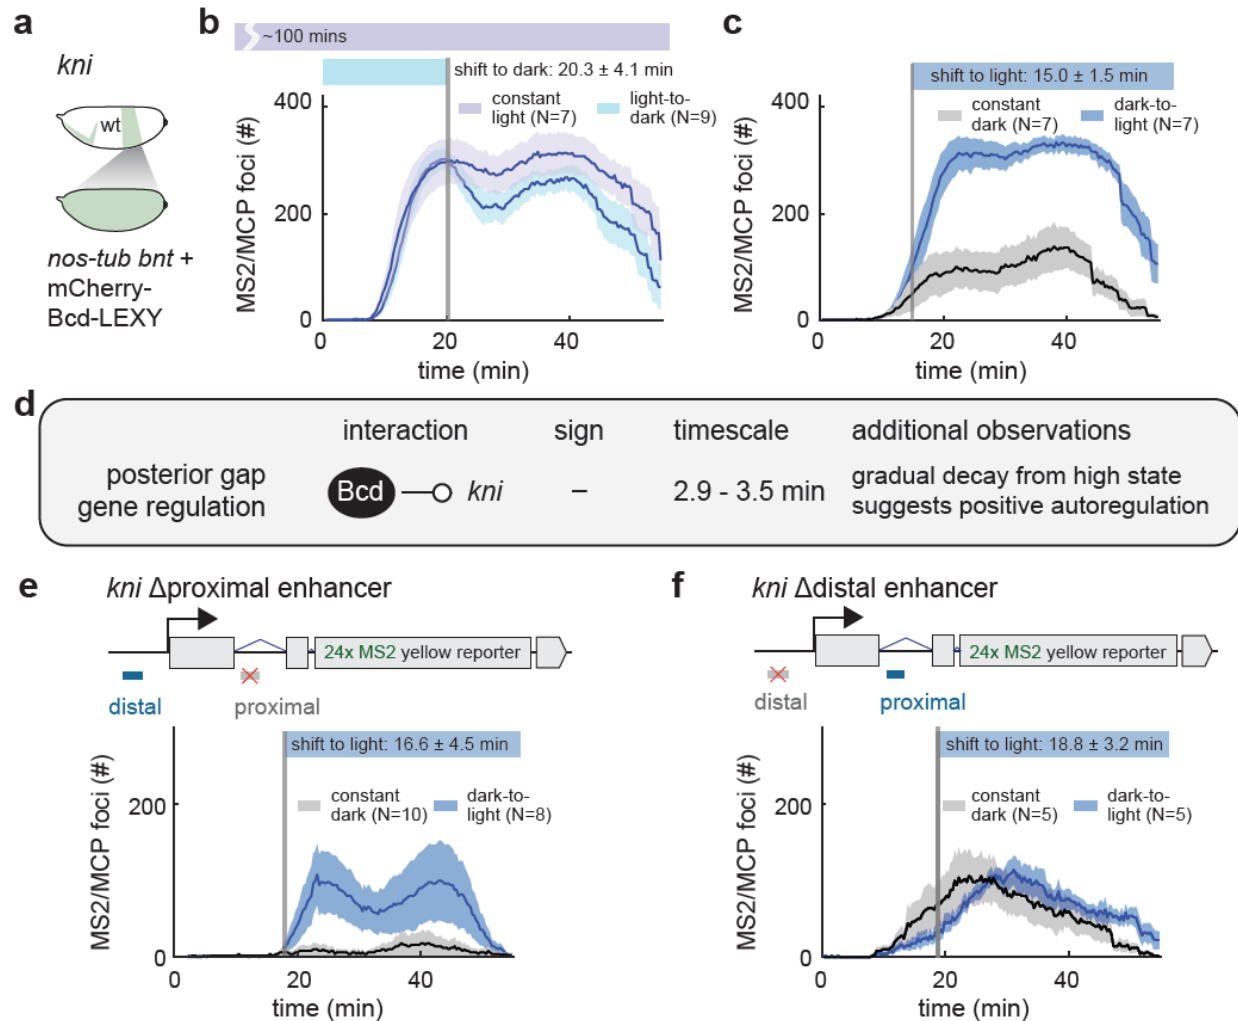

267

**Figure 6. Acute removal of Bcd drives rapid activation of posterior *kni* transcription. (a-c)**

Uniformly expressed mCherry-Bcd-LEXY embryos were imaged using a *kni* MS2 transcription reporter upon an acute shift from light to dark (in **b**) and dark to light (in **c**); constant-light and constant-dark stimuli were used as controls. (**d**) Summary of rapid perturbation results. An acute decrease in mCherry-Bcd-LEXY expression, representing a change from central to posterior Bcd levels, drives a rapid rise in *kni* expression. In the converse experiment, *kni* transcription drops rapidly but only slightly upon acute Bcd nuclear import, suggesting that *kni* transcription is positively autoregulated. (**e-f**) Experiments as in **c** for *kni* reporters in which the proximal enhancer (in **e**) or the distal enhancer (in **f**) were replaced with non-targeted sequence. For **b-f**, shaded regions show standard error of the mean, and the number of embryos tested is indicated on each plot.

268

269 levels that were comparable to those achieved under continuous illumination (**Figure 6b**).

270 Conversely, a light-induced increase in nuclear Bcd triggered a similarly rapid but smaller-

271 amplitude decrease in *kni* transcription (**Figure 6b**). Just as in the case of *gt*, the stability of the

272 high-*kni*-expressing state may be indicative of positive autoregulation of *kni* expression by its  
273 own protein product. Together, these data suggest that Bcd can act as an apparent repressor of  
274 *kni* expression, an unexpected role for Bcd which is typically considered to perform only  
275 transcriptional activation functions. The initiation of *kni* transcription within 2 min after Bcd  
276 nuclear export is only compatible with a direct regulatory link, not Bcd-induced expression of an  
277 intermediate repressor.

278

279 To gain further insight into the repressive effect, we set out to define its requirements in the  
280 *kni* enhancer regions. The posterior pattern of *kni* expression is known to be regulated by two  
281 enhancers, an 818 bp proximal enhancer and a 2.3 kb distal enhancer<sup>38,40</sup>. We generated embryos  
282 expressing *kni* MS2 reporters with either the proximal or distal enhancer sequence replaced with  
283 non-regulated sequence<sup>41</sup> and monitored expression in response to acute Bcd removal (**Figure**  
284 **6e-f**). We found that the *kni* reporter lacking the proximal enhancer (*kni* Δproximal reporter) still  
285 showed potent regulation by mCherry-Bcd-LEXY, whereas the *kni* Δdistal reporter was not  
286 affected by light-induced changes in nuclear Bcd (**Figure S4e-f; Video S7-8**). Transcription  
287 from the *kni* Δproximal reporter also rose rapidly upon the shift to blue light, matching what was  
288 observed from the wild-type regulatory sequence (**Figure 6c,e**). Our results are consistent with  
289 prior observations that the *kni*-distal enhancer exhibits higher Bcd binding than does the *kni*-  
290 posterior enhancer, arguing that Bcd exerts its regulatory effects at the distal enhancer<sup>38,40</sup>. In  
291 summary, our acute stimulus-response framework identifies a rapid, repressive role for Bcd in  
292 regulating *kni* transcription through the *kni* distal enhancer, underscoring the power of  
293 optogenetic perturbation in a simplified genetic context to identify both known and unknown  
294 gene regulatory relationships.

## 295 **Discussion**

### 296 **A stimulus-response strategy for dissecting complex developmental gene networks**

297 We have described a combined genetic and optogenetic strategy to gain insight into one  
298 canonical developmental patterning network: control of gap gene expression by the Bicoid  
299 morphogen during *Drosophila* embryogenesis. Our strategy relies on three advances. First, we  
300 experimentally simplify the conditions under which the gap gene network operates, eliminating  
301 all pre-existing landmarks along the anterior-posterior axis to produce embryos with uniform  
302 positional identity. Although the reduced network involves just one input transcription factor  
303 (Bicoid) and four output genes (anterior *giant*, anterior *hunchback*, central *Krüppel*, and posterior  
304 *knirps*), it captures much of the complexity of the wildtype pattern including stripes of gap gene  
305 expression when Bcd is delivered in a head-to-tail gradient<sup>2</sup>. Second, we re-introduce  
306 optogenetic Bcd variants to shift these uniform embryos to any of three distinct anterior-posterior  
307 positions, enabling us to experimentally isolate specific gap genes patterns. Finally, we combine  
308 acute optogenetic perturbation with live-cell biosensors of target gene expression to map the  
309 network's responses to acute changes in transcription factor concentration over time. Doing so  
310 required establishing new imaging methods for two-color confocal imaging and optogenetic  
311 activation *in vivo*, a challenge we solved by combining 970 nm two-photon imaging of  
312 GFP/mCherry with 450 nm excitation of the LEXY optogenetic system.

313

### 314 **Bcd-dependent regulation of anterior and posterior gap gene patterns**

315 Our optogenetic stimulus-response experiments broadly support the canonical view of Bicoid  
316 as a direct transcriptional activator of *gt*, *hb*, and *Kr*. We find that both *gt* and *hb* are transcribed  
317 rapidly upon acute Bicoid nuclear import (**Figure 4**) and *Kr* expression requires the presence of

318 low Bicoid activity (**Figure 5**). Our data also point to multiple regulatory links between gap  
319 genes. We find that *gt* expression is sustained when nuclear Bicoid is acutely removed (**Figure**  
320 **4**), consistent with reports of its positive autoregulation<sup>42</sup>; that *Kr* exhibits delayed negative  
321 regulation by Bicoid (**Figure 5**), likely through Gt as an intermediate node<sup>43</sup>; and that *kni*  
322 expression remains high even after Bicoid nuclear import (**Figure 6**), consistent with its positive  
323 autoregulation<sup>44</sup>. Importantly, each of these network connections can be identified using a single,  
324 unified experimental workflow: acute optogenetic Bicoid perturbation and live recording and  
325 quantification of a target gene's transcriptional dynamics.

326

327 Our study also revealed an unexpected result: rapid initiation of *kni* transcription after acute  
328 removal of mCherry-Bicoid-LEXY from the nucleus. Bicoid is not expected to act as a  
329 transcriptional repressor, so it is surprising to find any context in which its removal triggers rapid  
330 initiation of transcription. Classical models interpret loss of *kni* at anterior positions as being the  
331 consequence of indirect Bicoid-dependent regulation: repression by anterior gap gene products  
332 (e.g. *hb* or *Kr*) or weak activation by Caudal, which is translationally repressed by Bicoid<sup>38,45,46</sup>.  
333 Our result appears inconsistent with all of these explanations, as *kni* expression rises near-  
334 instantaneously after mCherry-Bicoid-LEXY nuclear export (**Figure 6**), too rapidly for changes  
335 in gap gene or Caudal protein levels to occur. Furthermore, rapid *kni* de-repression requires the  
336 distal enhancer, the predominant site of Bcd binding<sup>38,40</sup>.

337

338 How might rapid transcriptional activation occur upon loss of nuclear Bicoid? Our data is  
339 consistent with many possible mechanisms. Bicoid may compete for binding to the *kni* distal  
340 enhancer with another more potent transcriptional activator, such that Bicoid loss paradoxically

341 increases *kni* expression. Alternatively, Bicoid may cooperatively associate with a transcriptional  
342 repressor at the *kni* enhancer and lead to increased repressor binding, mirroring the well-  
343 established interaction between Dorsal and Groucho for repressing subsets of genes along the  
344 dorsoventral axis<sup>47,48</sup>. We look forward to future studies that precisely define Bcd's repressive  
345 role in *kni* expression, as well as extension of our acute stimulus-response methods to other  
346 complex gene regulatory networks.

347

348 Optogenetic stimuli have recently found widespread use in developmental contexts, from  
349 identifying critical time windows for developmental decisions<sup>13,49-52</sup> to erasing and replacing  
350 signaling gradients with spatial light patterns<sup>53</sup>. However, optogenetic control on its own is not a  
351 panacea for revealing the inner workings of complex biological networks. Here we show that  
352 optogenetics can be used at a more granular level to home in on dynamic relationships between a  
353 transcription factor and its target genes *in vivo*. Nevertheless, work on an experimentally reduced  
354 system only constitutes a first step in understanding the full gap gene network, and we look  
355 forward to future studies that examine Bicoid-dependent responses as other factors from the  
356 natural system are systematically re-introduced. We can also envision extending the current  
357 approach to perturbing multiple nodes (e.g., by constructing LEXY fusions of all gap genes);  
358 quantitative modeling<sup>4</sup> could elaborate network architecture still further. The future is bright for  
359 optogenetic interrogation of developmental gene networks.

360

## 361 **Material and methods**

362 **Plasmids.** Constructs were generated using In-Fusion assembly (Clontech) and oligonucleotides  
363 for primers were obtained from Integrated DNA Technologies. Constructs are available via  
364 Addgene or on request. Bcd-LEXY constructs are generated from pCol- $\alpha$ Tub67C-EGFP-Bcd-  
365 FRT-*bcd* 3'UTR- 3xP3-RFP-FRT-*sqh* 3'UTR<sup>54</sup>, where the N-terminal EGFP was either removed  
366 or replaced by iRFP or mCherry and LEXY domain was inserted as C-terminus with a 15 amino-  
367 acid long linker in between. NLS-mCherry-LEXY constructs are generated by ligation of the  
368 NLS-mCherry-LEXY insert part PCR amplified from a mammalian expression vector (Addgene  
369 #72655<sup>11</sup>) and a fly expression vector pBabr-mTub-MCS-*sqh*3'UTR (courtesy from Wieschaus  
370 lab) digested by restriction enzymes NheI and SpeI. mCherry was subsequently replaced by  
371 EGFP to generate NLS-EGFP-LEXY plasmid.

372

373 **Fly stocks and genetics.** Establishing Bcd-LEXY and *bcd nos tsl* fly stocks: For generation of  
374 transgenic flies and stocks, all four Bcd-LEXY (Bcd-LEXY, EGFP-Bcd-LEXY, iRFP-Bcd-  
375 LEXY and mCherry-Bcd-LEXY) constructs were integrated into the third chromosome using the  
376  $\phi$ C31-based integration system<sup>55</sup> at the VK33 site (65B2) by BestGene. NLS-mCherry-LEXY  
377 and NLS-EGFP-LEXY constructs were integrated into the second chromosome at the VK02 site  
378 (47C6). Each Bcd-LEXY variant was then further recombined either with *bcd*<sup>E1</sup> or *bcd*<sup>E1</sup> *nos*<sup>BN</sup>  
379 *tsl*<sup>4</sup> on the third chromosome<sup>54</sup>. NLS-mCherry-LEXY was recombined with MCP-mNeonGreen  
380 on the second chromosome, and further crossed with *bcd*<sup>E1</sup> *nos*<sup>17</sup> *tsl*<sup>4</sup> on third chromosome to  
381 generate MCP-mNeonGreen NLS-mCherry / Cyo; *bnt* / TM3 flies.

382



383 We obtained few and poor-quality embryos from *bcd<sup>E1</sup> nos<sup>BN</sup> tsl<sup>4</sup>* homozygous females, and  
384 thus used *bcd<sup>E1</sup> nos<sup>BN</sup> tsl<sup>4</sup> / bcd<sup>E1</sup> nos<sup>I7</sup> tsl<sup>4</sup>* transheterozygotes for further experiments. While  
385 *nos<sup>BN</sup>* is a complete loss of both *nos* RNA and protein, which impedes both pole cell migration  
386 and therefore germline cells formation and abdominal segmentation, *nos<sup>I7</sup>* is a partial deletion  
387 near C-terminal of the zinc-finger domain that maintains normal germline development.  
388 However, in terms of body segmentation phenotype and gap gene expression pattern, *nos<sup>BN</sup>* and  
389 *nos<sup>I7</sup>* both exhibit indistinguishable patterns as expected from severe loss of function<sup>56,57</sup>,  
390 supporting the use of this transheterozygous background for *nanos* loss of function in A-P  
391 patterning.

392

393 Establishing uniform Bcd-LEXY embryos: To achieve uniform Bcd expression, Bcd-LEXY, *bnt*  
394 flies were crossed to heat shock-inducible *flippase* expressing flies and the resulting larvae were  
395 heat shocked at 37°C for three continuous days for 1 hour each day. After one generation of  
396 outcrossing, progeny lacking the *bcd* 3'UTR were sorted by loss of RFP expression. Then Bcd-  
397 LEXY variants were driven by *sqh* 3'UTR (see **Figure 2A**) resulting in a uniform distribution of  
398 Bcd along the AP axis.

399

400 Establishing *nos-tub bnt* uniform Bcd-LEXY embryos: In wild-type embryos, *nanos* mRNA is  
401 localized at the posterior pole and produces a posterior-to-anterior gradient of Nanos protein<sup>19</sup>. A  
402 second population of *nanos* mRNA is not asymmetrically patterned and produces uniform Nanos  
403 protein that plays a crucial role in suppressing maternal Hunchback translation<sup>20</sup>. Complete loss  
404 of *nanos* disrupts both the patterned and uniform contributions, leading to abnormally high levels  
405 of Hunchback throughout the embryo. We thus used a *nos-tub:TCEIIUC:AG* construct<sup>20</sup>

406 (courtesy of the Gavis lab) as a uniformly-expressed, reduced-activity form of Nanos to reduce  
407 maternal Hb levels, thereby allowing expression of abdominal gap genes like *kni* and *gt*. The  
408 construct was further recombined to the Sp marker on the same chromosome to mark the  
409 transgene, and then crossed with male uniform Bcd-LEXY *bcd<sup>E1</sup> nos<sup>BN</sup> tsl<sup>4</sup>* / TM3 flies to  
410 generate nos-tub:TCEIUC:AG /+; uBcd-LEXY *bcd<sup>E1</sup> nos<sup>BN</sup> tsl<sup>4</sup>* / TM3 flies. By crossing males  
411 of the preceding genotype to MCP-mNeonGreen, NLS-mCherry / Cyo; *bcd<sup>E1</sup> nos<sup>l7</sup> tsl<sup>4</sup>* / TM3  
412 females, we obtained female flies with the genotype nos-tub:TCEIUC:AG / MCP-mNeonGreen  
413 NLS-mCherry; uBcd-LEXY *bcd<sup>E1</sup> nos<sup>BN</sup> tsl<sup>4</sup>* / *bcd<sup>E1</sup> nos<sup>l7</sup> tsl<sup>4</sup>* that we then caged with MS2  
414 reporter males for live imaging.

415

416 **Cuticle preparation.** For dark and light conditions, embryos with specific Bcd-LEXY variants  
417 were collected between 0-1 h post laying in the dark on an agar plate. Then embryos for the light  
418 condition were placed under a custom-built panel of blue LEDs and removed from light after  
419 4hrs. In dark conditions, embryos were kept in a light-tight box away from ambient room light or  
420 blue light to prevent inadvertent optogenetic stimulation. After a 3 h incubation in light or dark  
421 conditions, embryos were kept at room temperature (at 22°C) for another 24-36 h and then  
422 bleached, then moved to the methanol-heptane glass tube and vigorously shaken for 20 sec.  
423 Embryos settled at the bottom were removed and placed on a glass slide with Hoyer's solution  
424 (1:1 premix lactic acid) and sandwiched between the glass slide and cover glass. The slide was  
425 placed at 65°C overnight and then imaged on a Nikon Eclipse Ni dark-field microscope at 10x  
426 zoom.

427

428 **Immunostaining and imaging.** Embryos were collected every 2 h and aged in dark for another  
429 2 h. Embryos were dechorionated by bleaching and then heat fixed and stained essentially as  
430 described in<sup>1,54</sup> with rabbit anti-Bcd, mouse anti-Hb primary antibodies (courtesy by Eric  
431 Wieschaus) and sheep anti-GFP (Invitrogen, USA) followed by fluorophore-conjugated  
432 secondary antibodies Alexa-488 (sheep), Alexa-555 (mouse), and Alexa-647 (rabbit) from  
433 Invitrogen. For pairwise comparisons of wild-type and mutant backgrounds, embryos expressing  
434 HisGFP collected the same way were mixed in each tube for staining and imaging. Stained  
435 embryos were imaged on a Nikon A1R laser-scanning confocal microscope, and a 5  $\mu\text{m}$  z-stack  
436 around the midsagittal plane with step size of 1  $\mu\text{m}$  were taken. For data analysis, custom  
437 MATLAB imaging analysis code recognized the contour of the embryo and extracted the  
438 intensity of the surface nuclei for all three channels. Intensities of three channels were  
439 normalized to HisGFP embryos that mixed in each slide respectively, with 1 being the mean  
440 maximal intensity of HisGFP embryos. For Hb level, min-max normalization was further  
441 conducted for clear comparison of boundary position, and half maximal positions of the posterior  
442 boundary of anterior expression domain were picked out for each genotype for the box plot.  
443

444 **Two-photon microscopy.** A custom microscope was built to simultaneously perform two-  
445 photon excitation imaging and localized optogenetic stimulation on the same setup. A  
446 Chameleon Ultra II tunable laser was used at 970 nm to simultaneously excite green and red-  
447 tagged biomolecules<sup>17,58,59</sup>. The laser beam was collimated and passed through a laser power  
448 modulator Pockels cell (350-80-LA-02 KD P Series E-O Modulator, Conoptics, USA). The  
449 output laser beam was expanded to 4 mm diameter (AC254-050-AB-ML, AC254-150-AB-ML,  
450 Thorlabs, USA) before reaching a two-axis scan galvo mirror (6210H, Cambridge Technology,

451 USA). After the scan mirrors, the laser beam passed through a f-theta lens (focal length 63 mm;  
452 4401-388-000-20, Linos, USA), a tube lens (focal length 180 mm, AC508-180-AB-ML,  
453 Thorlabs) and focused on the imaging sample using a high numerical aperture objective (NA,  
454 Nikon 1.3 NA, 40X). The fluorescence signal was collected and sent to two sensitive point photo  
455 multiplier tubes (H10770A-40, Hamamatsu, Japan). The microscope setup interfaces via data  
456 acquisition cards (DAQ; PCIe 6321 and PCIe 6374, National Instruments, USA) using  
457 MATLAB-based ScanImage 5.6 software<sup>60</sup>. For live imaging, embryos were imaged close to  
458 cover glass surface (image resolution 1024x512 pixels at 3.2  $\mu$ s pixel dwell-time; see imaging  
459 details in **Table S3**).

460

461 **Optogenetic stimulation.** LEXY perturbation was achieved using a digital micro-mirror device  
462 (DMD; DLP 4500 LightCrafter, Texas Instruments, USA) to project spatial patterns and to  
463 rapidly change light levels<sup>5</sup> (see **Figure S2a**) through a parallel light path using a long-pass 473  
464 nm dichroic mirror and a combination of color and interference filters to attenuate the DMD's  
465 blue LED wavelength ( $445 \pm 8$  nm). To synchronize two-photon image acquisition and DMD  
466 blue light activation cycles, an external trigger mode in DLP LightCrafter control software was  
467 used. The software controls the LED light wavelength, pulse duration, pulse duty cycle, the  
468 number of pulses, and the type of spatial image pattern to project on the imaging sample (see  
469 details in **Table S3**). The optimum blue light level for optogenetic perturbation was determined  
470 by optimizing the maximum protein export with minimal light scattering to neighboring nuclei  
471 (see **Figure 2e**). After scanning the range between 50–250  $\mu$ W/cm<sup>2</sup> of blue-light on/off pulsatile  
472 cycles of LEXY-tagged protein nuclear signal (data not shown), 100  $\mu$ W/cm<sup>2</sup> was determined for  
473 all optogenetic perturbations performed in this study.

474

475 **Live imaging data collection.** For the live data acquisition and light perturbation experiments,  
476 flies were kept in dark at 25°C and the embryos were collected on an agar plate between 1-2 hrs  
477 post laying. For live imaging, embryos were dechorionated on double-sided tape and mounted on  
478 a glued membrane film (Lumox film, Starstedt, Germany). Followed by covering them in  
479 halocarbon oil 27 and sandwiched between the membrane and the cover glass slide (cover glass  
480 washed and cleaned with pure ethanol, slide #1.5, Sigma BR470045). The data collection was  
481 performed using a custom-built two-photon microscope using 970 nm laser excitation for green  
482 (EGFP and mNeonGreen tagged protein and MS2 loops respectively) and red (only the NLS-  
483 mCherry-LEXY) at room temperature (ranges from 21.5-22.5 °C). And the blue light  
484 perturbation was done by a DMD unit installed on the same setup; see (see microscope section).  
485 Summarized details on data collection for specific experiments are tabulated in **Table S3**.

486

#### 487 **Data quantification and statistical analysis**

488 **Bcd-LEXY activity.** To estimate the functional Bicoid activity (potency) of fluorescently tagged  
489 Bcd-LEXY fusion proteins (as well as remaining activity in *bcd<sup>E1</sup>* homozygous mutant fly lines  
490 and the Bcd dose level), we used protein immunostaining of the Bcd target gene Hb and  
491 measured position shifts in the posterior Hb boundary as well as position shifts of the cephalic  
492 furrow. All shifts were scaled according to embryo length and the quantified estimates are  
493 presented in **Figure 2d-e** (**Table S1** for cephalic furrow position shifts).

494

495 **LEXY tagged protein export and import kinetics.** Blue light-induced LEXY export kinetics  
496 and nuclear localization signal (NLS)-induced import kinetics were determined by analyzing the

497 nuclear intensity of the fluorescent moiety of these fusion proteins. Intensity time traces were  
498 averaged and fitted with a single exponential  $n_0 \cdot \exp(-t/\tau)$  to estimate the export rate, i.e. the  
499 inverse of the time constant. Similarly, the import time constants were estimated using  $n_0 \cdot (1 -$   
500  $\exp(-t/\tau))$  as the fitting model (**Figure 2f-h**). Note: the uniform EGFP-Bcd-LEXY, NLS-  
501 mCherry-LEXY, and NLS-EGFP-LEXY lines were measured using the DMD-equipped custom-  
502 built two-photon microscope, while the uniform mCherry-Bcd-LEXY and iRFP-Bcd-LEXY  
503 lines were imaged on a commercial Nikon A1R confocal microscope (imaging conditions can be  
504 found in **Table S3**). For LEXY translocation kinetics fits, the mean and the standard deviation  
505 are presented for multiple embryo replicates.

506

507 **Quantification of the reporter gene MS2 spots.** We created a custom MATLAB script to  
508 analyze and visualize time-lapse MS2 counts. In brief, two-color raw tiff image data was  
509 acquired on a custom-built two-photon microscope (MS2 data acquisition setting details can be  
510 found **Table S3**; see **Figure S3** and **Figure S4**). The red channel NLS-mCherry-LEXY nuclear  
511 signal was segmented, and intensity traces were used to estimate nuclear cycle start and the  
512 optogenetic perturbation state during MS2 imaging. The rise in NLS-mCherry-LEXY signal time  
513 was set to 5.6 min in NC14 (this x-axis time offset was set for C14 start for both red and green  
514 channels; see **Figure S3d**). For MS2 data, the image data was z-max projected (8 total z slices,  
515 each 1.1  $\mu\text{m}$  apart), then a 2D gaussian filter was applied to filter-out small structures and  
516 followed by threshold to select MS2 spots. Finally, every spot was counted as an active MS2  
517 spot in the center part of the embryo ( $40 \times 150 \mu\text{m}^2$  ROI) for either blue light illuminated or dark  
518 conditions embryos. All the data representing spot count time traces indicate the mean and  
519 standard error of the mean over multiple embryo measurements, unless stated otherwise.

520

521 **Mean response time post light perturbation.** For response time quantification, we measured  
522 the difference between individual MS2 foci count time traces (On-Off) with mean MS2 foci  
523 count time traces (On) light condition (**Figure 4b** light blue color individual traces subtracted by  
524 mean purple trace). Followed by taking gradient (25% amplitude change) and embryos showing  
525 no change or below the threshold (<25%) were excluded from the analysis. Finally, the response  
526 mean-time and standard error of the mean were reported in **Table S2** (taking account of error in  
527 light on/off time by using error propagation).

528

## 529 **Acknowledgements**

530 The authors thank members of the Gregor and Toettcher laboratories, Liz Gavis, Mustafa  
531 Khammash, Sant Kumar, Jason Puchala, and Trudi Schüpbach. The project was supported by  
532 NSF grant PHY-1734030 (T.G.) and CAREER-1750663 (J.E.T.); NIH grants R01GM097275  
533 (T.G.), U01DA047730 (T.G.), U01DK127429 (T.G. and J.E.T.), T32GM007388 (M.S.); and a  
534 Princeton MOL Innovation Award (J.E.T.). We also acknowledge imaging support from the  
535 Princeton Molecular Biology Microscopy Facility, which is a Nikon Center for Excellence.

536

## 537 **References**

- 538 1 Briscoe, J. & Small, S. Morphogen rules: design principles of gradient-mediated embryo  
539 patterning. *Development* **142**, 3996-4009, doi:10.1242/dev.129452 (2015).
- 540 2 Petkova, M. D., Tkacik, G., Bialek, W., Wieschaus, E. F. & Gregor, T. Optimal  
541 Decoding of Cellular Identities in a Genetic Network. *Cell* **176**, 844-855 e815,  
542 doi:10.1016/j.cell.2019.01.007 (2019).
- 543 3 Hannon, C. E., Blythe, S. A. & Wieschaus, E. F. Concentration dependent chromatin  
544 states induced by the bicoid morphogen gradient. *Elife* **6**, doi:10.7554/eLife.28275  
545 (2017).

- 546 4 Jaeger, J. *et al.* Dynamic control of positional information in the early *Drosophila*  
547 embryo. *Nature* **430**, 368-371, doi:10.1038/nature02678 (2004).
- 548 5 Wilson, M. Z., Ravindran, P. T., Lim, W. A. & Toettcher, J. E. Tracing Information Flow  
549 from Erk to Target Gene Induction Reveals Mechanisms of Dynamic and Combinatorial  
550 Control. *Mol Cell* **67**, 757-769 e755, doi:10.1016/j.molcel.2017.07.016 (2017).
- 551 6 Rullan, M., Benzinger, D., Schmidt, G. W., Miliadis-Argeitis, A. & Khammash, M. An  
552 Optogenetic Platform for Real-Time, Single-Cell Interrogation of Stochastic  
553 Transcriptional Regulation. *Mol Cell* **70**, 745-756 e746,  
554 doi:10.1016/j.molcel.2018.04.012 (2018).
- 555 7 Lorena de Mena, Patrick Rizk & Rincon-Limas, D. E. (Front Genet., 2018).
- 556 8 Patel, A. L. *et al.* Optimizing photoswitchable MEK. *Proc Natl Acad Sci U S A* **116**,  
557 25756-25763, doi:10.1073/pnas.1912320116 (2019).
- 558 9 McFann, S., Dutta, S., Toettcher, J. E. & Shvartsman, S. Y. Temporal integration of  
559 inductive cues on the way to gastrulation. *Proceedings of the National Academy of*  
560 *Sciences of the United States of America* **118**, doi:10.1073/pnas.2102691118 (2021).
- 561 10 Farahani, P. E., Reed, E. H., Underhill, E. J., Aoki, K. & Toettcher, J. E. Signaling,  
562 Deconstructed: Using Optogenetics to Dissect and Direct Information Flow in Biological  
563 Systems. *Annual Review of Biomedical Engineering*, doi:10.1146/annurev-bioeng-  
564 083120-111648 (2021).
- 565 11 Niopek, D., Wehler, P., Roensch, J., Eils, R. & Di Ventura, B. Optogenetic control of  
566 nuclear protein export. *Nat Commun* **7**, 10624, doi:10.1038/ncomms10624 (2016).
- 567 12 SY, C. *et al.* Optogenetic Control Reveals Differential Promoter Interpretation of  
568 Transcription Factor Nuclear Translocation Dynamics. *Cell systems* **11**,  
569 doi:10.1016/j.cels.2020.08.009 (2020).
- 570 13 Kogler, A. C. *et al.* Extremely rapid and reversible optogenetic perturbation of nuclear  
571 proteins in living embryos. *Dev Cell* **56**, 2348-2363 e2348,  
572 doi:10.1016/j.devcel.2021.07.011 (2021).
- 573 14 Dowbaj, A. M. *et al.* An optogenetic method for interrogating YAP1 and TAZ nuclear-  
574 cytoplasmic shuttling. *J Cell Sci* **134**, doi:10.1242/jcs.253484 (2021).
- 575 15 Viswanathan, R., Hartmann, J., Pallares Cartes, C. & De Renzis, S. Desensitisation of  
576 Notch signalling through dynamic adaptation in the nucleus. *EMBO J* **40**, e107245,  
577 doi:10.15252/embj.2020107245 (2021).
- 578 16 Grimm, O. & Wieschaus, E. The Bicoid gradient is shaped independently of nuclei.  
579 *Development* **137**, 2857-2862, doi:10.1242/dev.052589 (2010).
- 580 17 Liu, F., Morrison, A. H. & Gregor, T. Dynamic interpretation of maternal inputs by the  
581 *Drosophila* segmentation gene network. *Proceedings of the National Academy of*  
582 *Sciences of the United States of America* **110**, 6724-6729, doi:10.1073/pnas.1220912110  
583 (2013).
- 584 18 Ing-Simmons, E. *et al.* Independence of chromatin conformation and gene regulation  
585 during *Drosophila* dorsoventral patterning. *Nature Genetics* **53**, 487-499,  
586 doi:doi:10.1038/s41588-021-00799-x (2021).
- 587 19 Gavis, E. R. & Lehmann, R. Translational regulation of nanos by RNA localization.  
588 *Nature* **369**, 315-318, doi:10.1038/369315a0 (1994).
- 589 20 Gavis, E. R., Chatterjee, S., Ford, N. R. & Wolff, L. J. Dispensability of nanos mRNA  
590 localization for abdominal patterning but not for germ cell development. *Mech Dev* **125**,



- 591 81-90, doi:10.1016/j.mod.2007.10.004 (2008).
- 592 21 Kinjo, T. *et al.* FRET-assisted photoactivation of flavoproteins for in vivo two-photon  
593 optogenetics. *Nature Methods* **16**, 1029-1036, doi:doi:10.1038/s41592-019-0541-5  
594 (2019).
- 595 22 Homans, R. J. *et al.* Two photon spectroscopy and microscopy of the fluorescent  
596 flavoprotein, iLOV. doi:10.1039/C8CP01699B (2018).
- 597 23 Garcia, H. G., Tikhonov, M., Lin, A. & Gregor, T. Quantitative imaging of transcription  
598 in living *Drosophila* embryos links polymerase activity to patterning. *Curr Biol* **23**, 2140-  
599 2145, doi:10.1016/j.cub.2013.08.054 (2013).
- 600 24 Lucas, T. *et al.* Live imaging of bicoid-dependent transcription in *Drosophila* embryos.  
601 *Curr Biol* **23**, 2135-2139, doi:10.1016/j.cub.2013.08.053 (2013).
- 602 25 Bothma, J. P. *et al.* Enhancer additivity and non-additivity are determined by enhancer  
603 strength in the *Drosophila* embryo. doi:doi:10.7554/eLife.07956 (2015).
- 604 26 Syed, S., Wilky, H., Raimundo, J., Lim, B. & Amodeo, A. A. The nuclear to cytoplasmic  
605 ratio directly regulates zygotic transcription in *Drosophila* through multiple modalities.  
606 doi:10.1073/pnas.2010210118 (2021).
- 607 27 Alon, U. Network motifs: theory and experimental approaches. *Nat Rev Genet* **8**, 450-  
608 461, doi:10.1038/nrg2102 (2007).
- 609 28 Hoch, M., Seifert, E. & Jackle, H. Gene expression mediated by cis-acting sequences of  
610 the Kruppel gene in response to the *Drosophila* morphogens bicoid and hunchback.  
611 *EMBO J* **10**, 2267-2278 (1991).
- 612 29 Jacob, Y., Sather, S., Martin, J. R. & Ollo, R. Analysis of Kruppel control elements  
613 reveals that localized expression results from the interaction of multiple subelements.  
614 *Proc Natl Acad Sci U S A* **88**, 5912-5916, doi:10.1073/pnas.88.13.5912 (1991).
- 615 30 Struhl, G., Johnston, P. & Lawrence, P. A. Control of *Drosophila* body pattern by the  
616 hunchback morphogen gradient. *Cell* **69**, 237-249, doi:10.1016/0092-8674(92)90405-2  
617 (1992).
- 618 31 Tsurumi, A. *et al.* STAT is an essential activator of the zygotic genome in the early  
619 *Drosophila* embryo. *PLoS Genet* **7**, e1002086, doi:10.1371/journal.pgen.1002086 (2011).
- 620 32 Nien, C. Y. *et al.* Temporal coordination of gene networks by Zelda in the early  
621 *Drosophila* embryo. *PLoS Genet* **7**, e1002339, doi:10.1371/journal.pgen.1002339 (2011).
- 622 33 Schulz, C. & Tautz, D. Autonomous concentration-dependent activation and repression  
623 of Kruppel by hunchback in the *Drosophila* embryo. *Development* **120**, 3043-3049  
624 (1994).
- 625 34 Ochoa-Espinosa, A. *et al.* The role of binding site cluster strength in Bicoid-dependent  
626 patterning in *Drosophila*. *Proc Natl Acad Sci U S A* **102**, 4960-4965,  
627 doi:10.1073/pnas.0500373102 (2005).
- 628 35 Kraut, R. & Levine, M. Spatial regulation of the gap gene giant during *Drosophila*  
629 development. *Development* **111**, 601-609 (1991).
- 630 36 Huang, A., Rupprecht, J.-F. & Saunders, T. E. Embryonic geometry underlies phenotypic  
631 variation in decanalized conditions. doi:doi:10.7554/eLife.47380 (2020).
- 632 37 Kraut, R. & Levine, M. Mutually repressive interactions between the gap genes giant and  
633 Kruppel define middle body regions of the *Drosophila* embryo. *Development* **111**, 611-  
634 621 (1991).
- 635 38 Rivera-Pomar, R., Lu, X., Perrimon, N., Taubert, H. & Jackle, H. Activation of posterior

- 636 gap gene expression in the *Drosophila* blastoderm. *Nature* **376**, 253-256,  
637 doi:10.1038/376253a0 (1995).
- 638 39 Hulskamp, M., Pfeifle, C. & Tautz, D. A morphogenetic gradient of hunchback protein  
639 organizes the expression of the gap genes Kruppel and knirps in the early *Drosophila*  
640 embryo. *Nature* **346**, 577-580, doi:10.1038/346577a0 (1990).
- 641 40 Li, L., Waymack, R., Elabd, M. & Wunderlich, Z. Two promoters integrate multiple  
642 enhancer inputs to drive wild-type *knirps* expression in the *D.*  
643 *melanogaster* embryo. *bioRxiv*, 2021.2003.2023.436657,  
644 doi:10.1101/2021.03.23.436657 (2021).
- 645 41 Bothma, J. P. *et al.* Enhancer additivity and non-additivity are determined by enhancer  
646 strength in the *Drosophila* embryo. *Elife* **4**, doi:10.7554/eLife.07956 (2015).
- 647 42 Hoermann, A., Cicin-Sain, D. & Jaeger, J. A quantitative validated model reveals two  
648 phases of transcriptional regulation for the gap gene giant in *Drosophila*. *Developmental*  
649 *Biology*, doi:<https://doi.org/10.1016/j.ydbio.2016.01.005> (2016).
- 650 43 R, K. & M, L. Mutually repressive interactions between the gap genes giant and Krüppel  
651 define middle body regions of the *Drosophila* embryo. *Development (Cambridge,*  
652 *England)* **111** (1991).
- 653 44 Jaeger, J. *et al.* Dynamical Analysis of Regulatory Interactions in the Gap Gene System  
654 of *Drosophila melanogaster*. doi:10.1534/genetics.104.027334 (2004).
- 655 45 Pankratz, M. J., Busch, M., Hoch, M., Seifert, E. & Jackle, H. Spatial control of the gap  
656 gene knirps in the *Drosophila* embryo by posterior morphogen system. *Science* **255**, 986-  
657 989, doi:10.1126/science.1546296 (1992).
- 658 46 Niessing, D., Blanke, S. & Jackle, H. Bicoid associates with the 5'-cap-bound complex of  
659 caudal mRNA and represses translation. *Genes Dev* **16**, 2576-2582,  
660 doi:10.1101/gad.240002 (2002).
- 661 47 Lehming, N. *et al.* An HMG-like protein that can switch a transcriptional activator to a  
662 repressor. *Nature* **371**, 175-179, doi:10.1038/371175a0 (1994).
- 663 48 Dubnicoff, T. *et al.* Conversion of dorsal from an activator to a repressor by the global  
664 corepressor Groucho. *Genes Dev* **11**, 2952-2957, doi:10.1101/gad.11.22.2952 (1997).
- 665 49 Sako, K. *et al.* Optogenetic Control of Nodal Signaling Reveals a Temporal Pattern of  
666 Nodal Signaling Regulating Cell Fate Specification during Gastrulation. *Cell Rep* **16**,  
667 866-877, doi:10.1016/j.celrep.2016.06.036 (2016).
- 668 50 Huang, A., Amourda, C., Zhang, S., Tolwinski, N. S. & Saunders, T. E. Decoding  
669 temporal interpretation of the morphogen Bicoid in the early *Drosophila* embryo. *Elife* **6**,  
670 doi:10.7554/eLife.26258 (2017).
- 671 51 Johnson, H. E. *et al.* The Spatiotemporal Limits of Developmental Erk Signaling. *Dev*  
672 *Cell* **40**, 185-192, doi:10.1016/j.devcel.2016.12.002 (2017).
- 673 52 A, H. & TE, S. A matter of time: Formation and interpretation of the Bicoid morphogen  
674 gradient. *Current topics in developmental biology* **137**, doi:10.1016/bs.ctdb.2019.11.016  
675 (2020).
- 676 53 Johnson, H. E., Djabrayan, N., Shvartsman, S. Y. & Toettcher, J. E. Optogenetic rescue  
677 of a patterning mutant. *Curr Biol, in press* (2020).
- 678 54 Hannon, C. E., Blythe, S. A. & Wieschaus, E. F. Concentration dependent chromatin  
679 states induced by the bicoid morphogen gradient. doi:doi:10.7554/eLife.28275 (2017).
- 680 55 Bischof, J., Maeda, R. K., Hediger, M., Karch, F. & Basler, K. An optimized transgenesis

- 681 system for *Drosophila* using germ-line-specific phiC31 integrases. *Proc Natl Acad Sci U*  
682 *SA* **104**, 3312-3317, doi:10.1073/pnas.0611511104 (2007).
- 683 56 Asaoka, M., Sano, H., Obara, Y. & Kobayashi, S. Maternal Nanos regulates zygotic gene  
684 expression in germline progenitors of *Drosophila melanogaster*. *Mech Dev* **78**, 153-158,  
685 doi:10.1016/s0925-4773(98)00164-6 (1998).
- 686 57 Arrizabalaga Muñiz, G. A. *Genetic and molecular analysis of the drosophila gene nanos*,  
687 Massachusetts Institute of Technology, (1999).
- 688 58 Gregor, T. *et al.* Probing the Limits to Positional Information. *Cell* **130**, 153-164,  
689 doi:10.1016/j.cell.2007.05.025 (2007).
- 690 59 Svoboda, K., Denk, W., Kleinfeld, D. & Tank, D. W. In vivo dendritic calcium dynamics  
691 in neocortical pyramidal neurons. *Nature* **385**, 161-165, doi:doi:10.1038/385161a0  
692 (1997).
- 693 60 Pologruto, T. A., Sabatini, B. L. & Svoboda, K. ScanImage: Flexible software for  
694 operating laser scanning microscopes. *BioMedical Engineering OnLine* **2**, 1-9,  
695 doi:doi:10.1186/1475-925X-2-13 (2003).
- 696
